# Supplementary material for: Exploration of lignin-binding synthetic polymers with pendant hydrophobic amino acids
Source: Royal Society of Chemistry journal article supplement (doi:10.1039/d4su00433g), 2024-11-01
Supplement: d4su00433g1.pdf [file d4su00433g1.pdf]

## Supplementary Information

### Exploration of lignin-binding synthetic polymers with pendant amino acids

Tomonari Tanaka,<sup>\*a</sup> Rika Hinohara,<sup>a</sup> Oscar Abraham Carias Duron,<sup>a</sup> Yuji Aso,<sup>a</sup>  
Naoko Kobayashi,<sup>b</sup> Kaori Saito,<sup>b</sup> Takashi Watanabe<sup>b</sup>

<sup>a</sup> Department of Biobased Materials Science, Graduate School of Science and Technology, Kyoto Institute of Technology, Matsugasaki, Sakyo-ku, Kyoto 606-8585, Japan.

<sup>b</sup> Biomass Product Tree Industry-Academia Collaborative Research Unit, Research Institute for Sustainable Humanosphere, Kyoto University, Gokasho, Uji, Kyoto 611-0011, Japan.

## Contents

|                          |   |
|--------------------------|---|
| 1. SEC chromatogram..... | 1 |
| 2. NMR spectra .....     | 2 |

## 1. SEC chromatogram

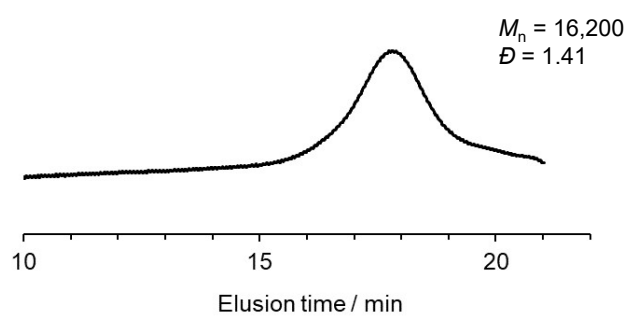

**Fig. S1** SEC chromatogram of NHS-polymer.

## 2. NMR spectra

RH134

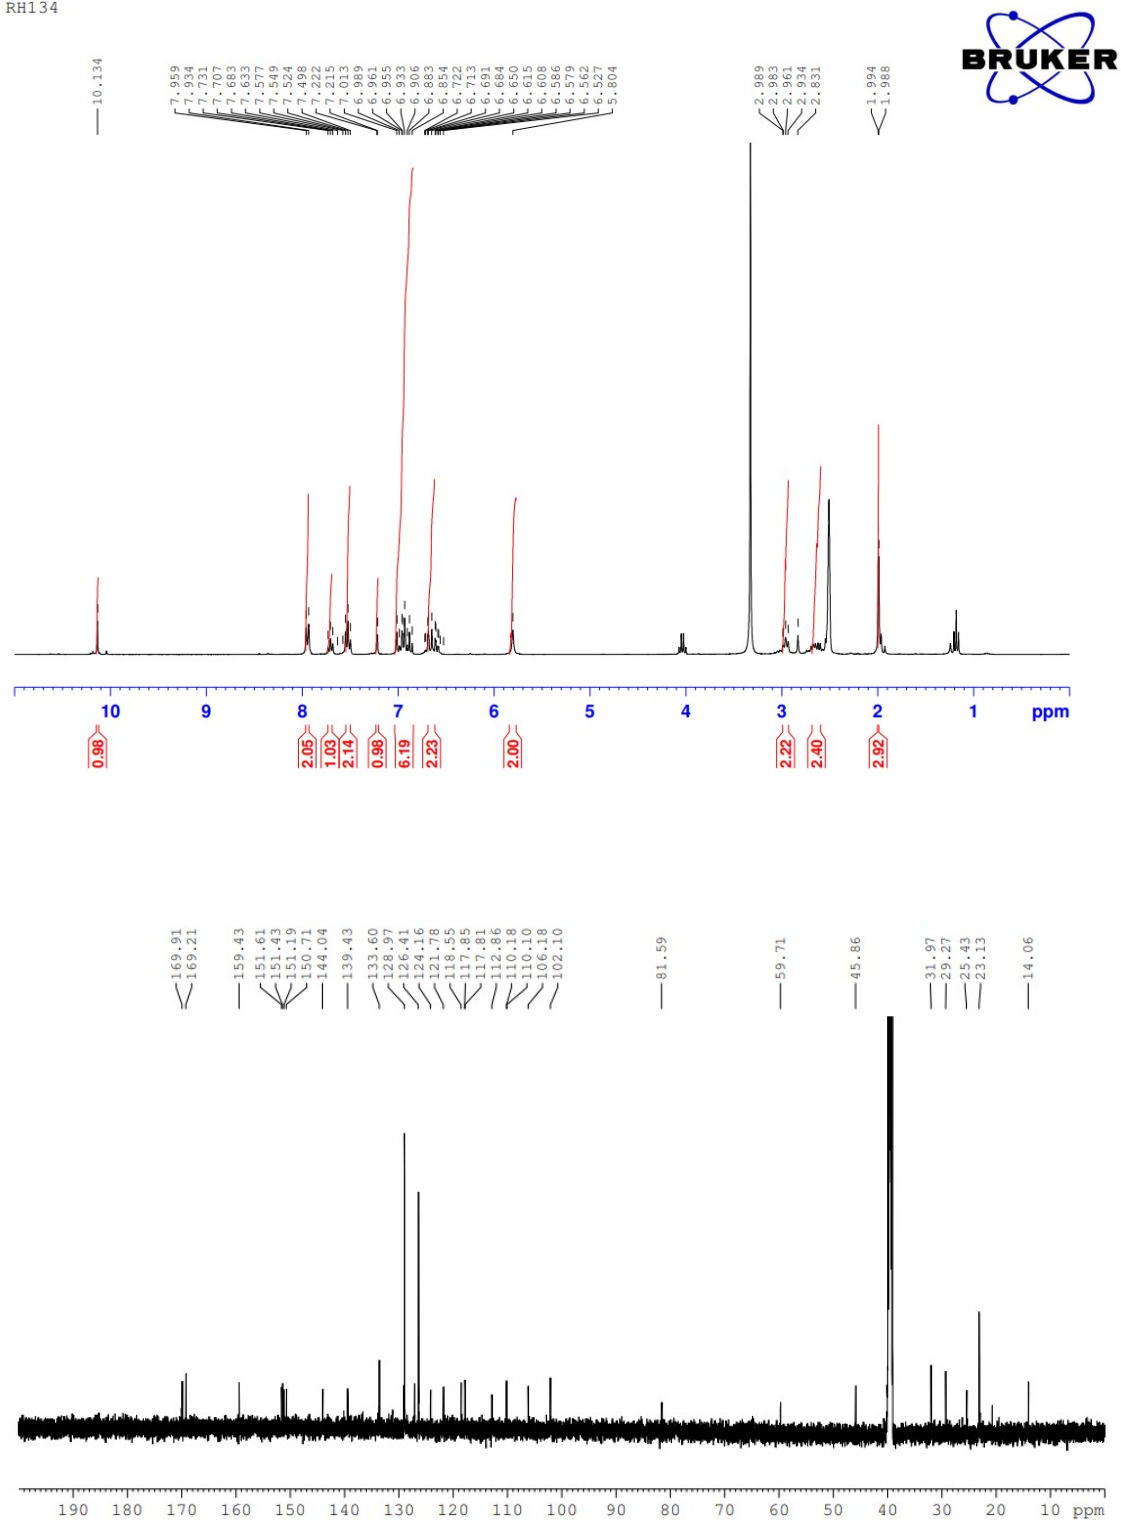

Fig. S2 <sup>1</sup>H and <sup>13</sup>C NMR spectra of fluorescein-bearing CTA in DMSO-*d*<sub>6</sub>.

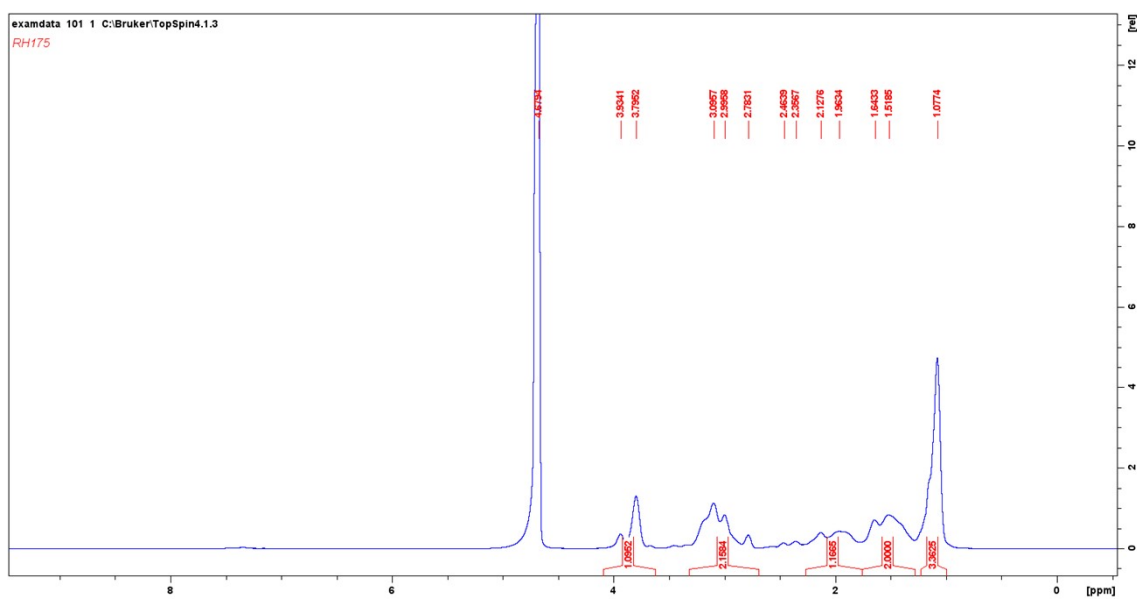

**Fig. S3**  $^1\text{H}$  NMR spectrum of **No AA** in  $\text{D}_2\text{O}$ .

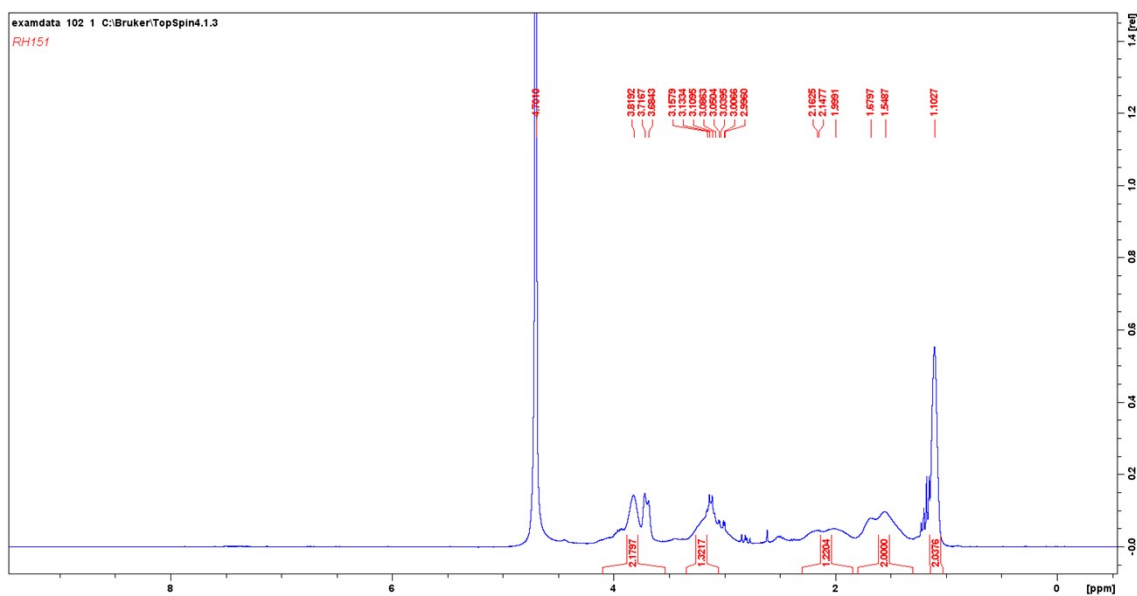

**Fig. S4**  $^1\text{H}$  NMR spectrum of **Gly29** in  $\text{D}_2\text{O}$ .

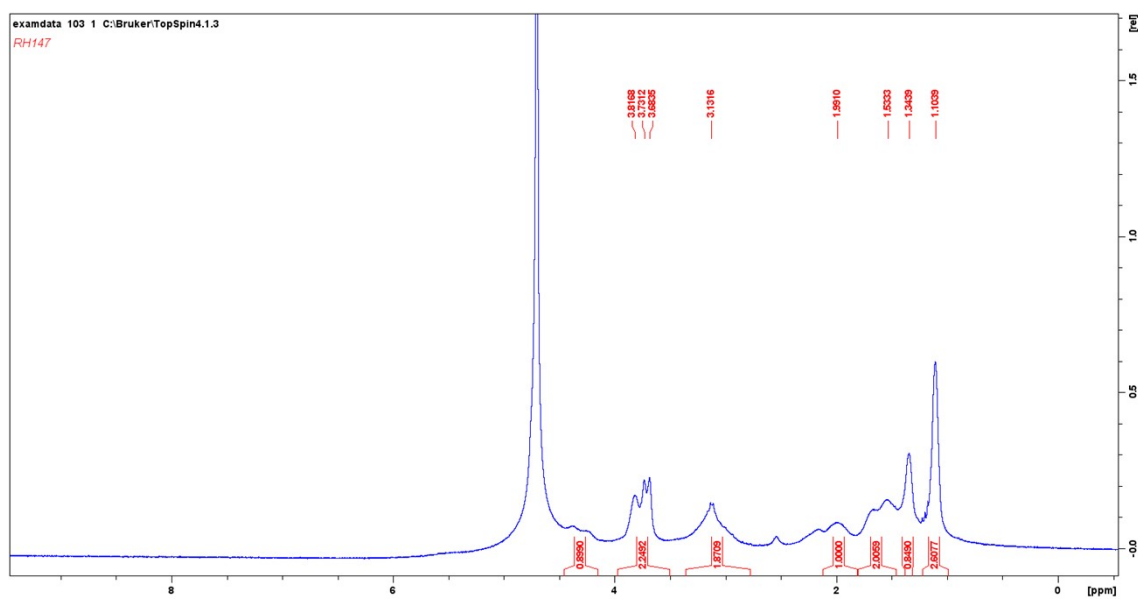

Fig. S5  $^1\text{H}$  NMR spectrum of Ala28 in  $\text{D}_2\text{O}$ .

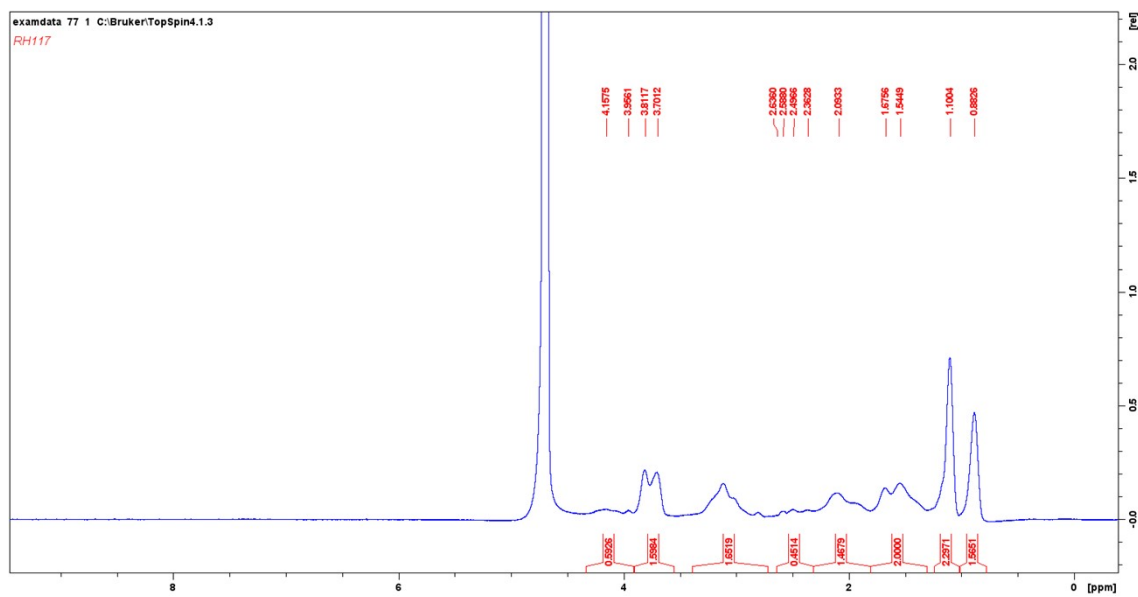

Fig. S6  $^1\text{H}$  NMR spectrum of Val26 in  $\text{D}_2\text{O}$ .

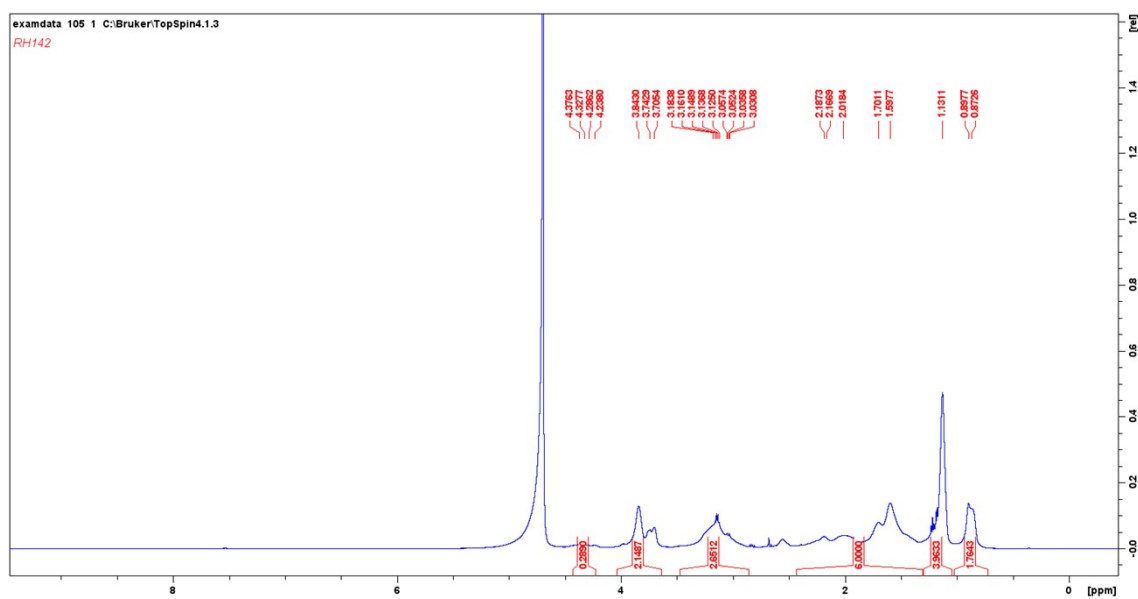

Fig. S7  $^1\text{H}$  NMR spectrum of **Leu29** in  $\text{D}_2\text{O}$ .

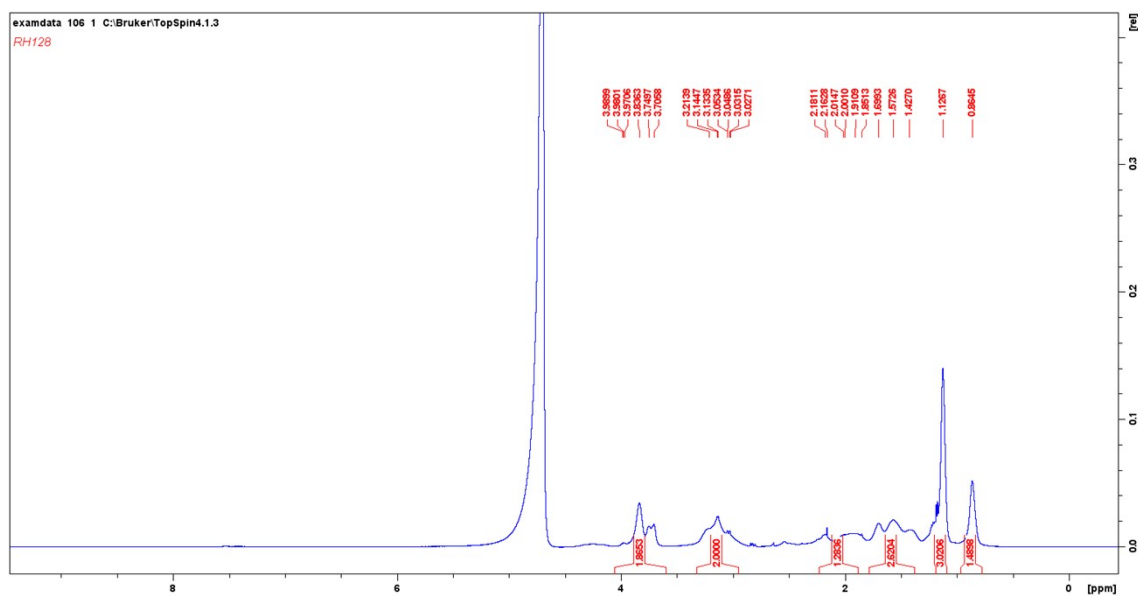

Fig. S8  $^1\text{H}$  NMR spectrum of **Ile25** in  $\text{D}_2\text{O}$ .

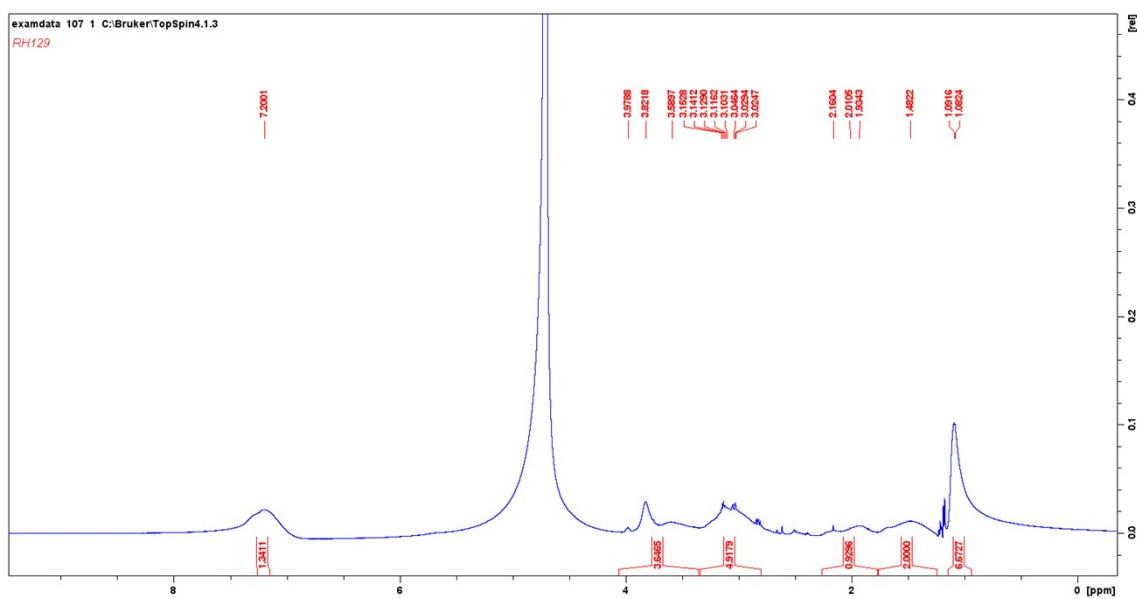

Fig. S9  $^1\text{H}$  NMR spectrum of **Phe27** in  $\text{D}_2\text{O}$ .

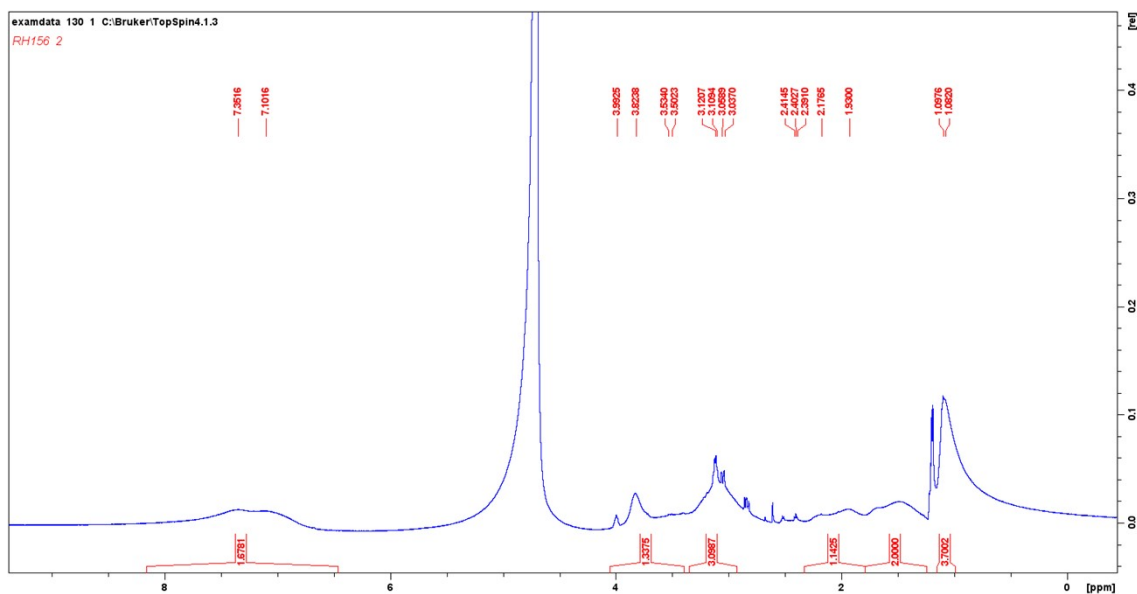

Fig. S10  $^1\text{H}$  NMR spectrum of **Trp29** in  $\text{D}_2\text{O}$ .



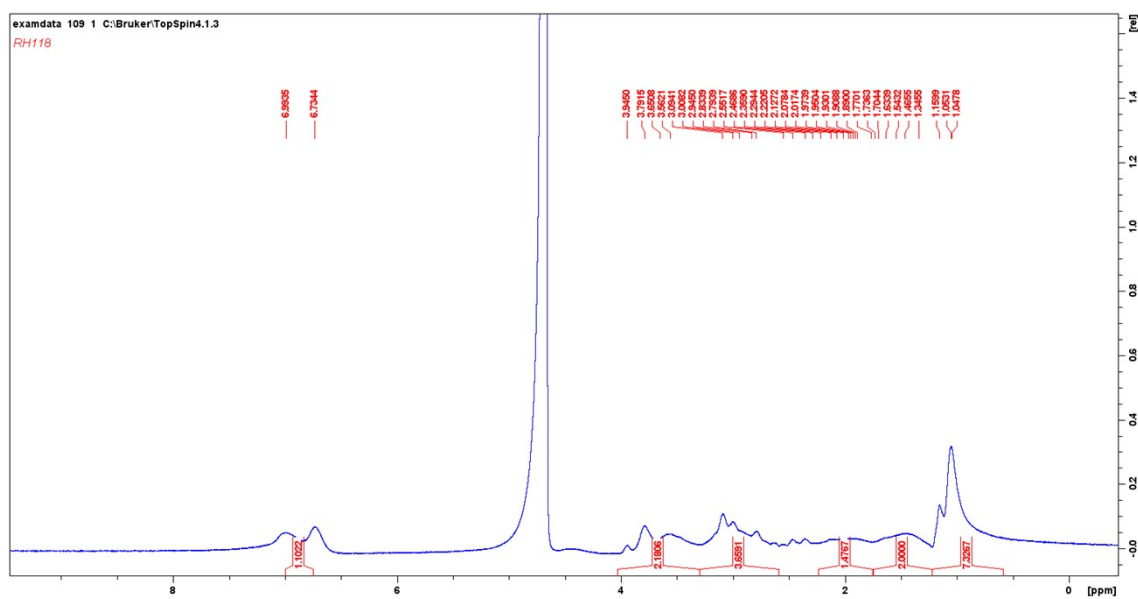

**Fig. S11**  $^1\text{H}$  NMR spectrum of Tyr22 in  $\text{D}_2\text{O}$ .
